# Supplementary material for: Synthesis of hydroxycinnamic acid glucuronides and investigation of their affinity for human serum albumin
Source: Royal Society of Chemistry journal article supplement (doi:10.1039/b809965k), 2008-01-01

Supplementary Information:  $^1\text{H-NMR}$  spectra of hydroxycinnamic acid glucuronides

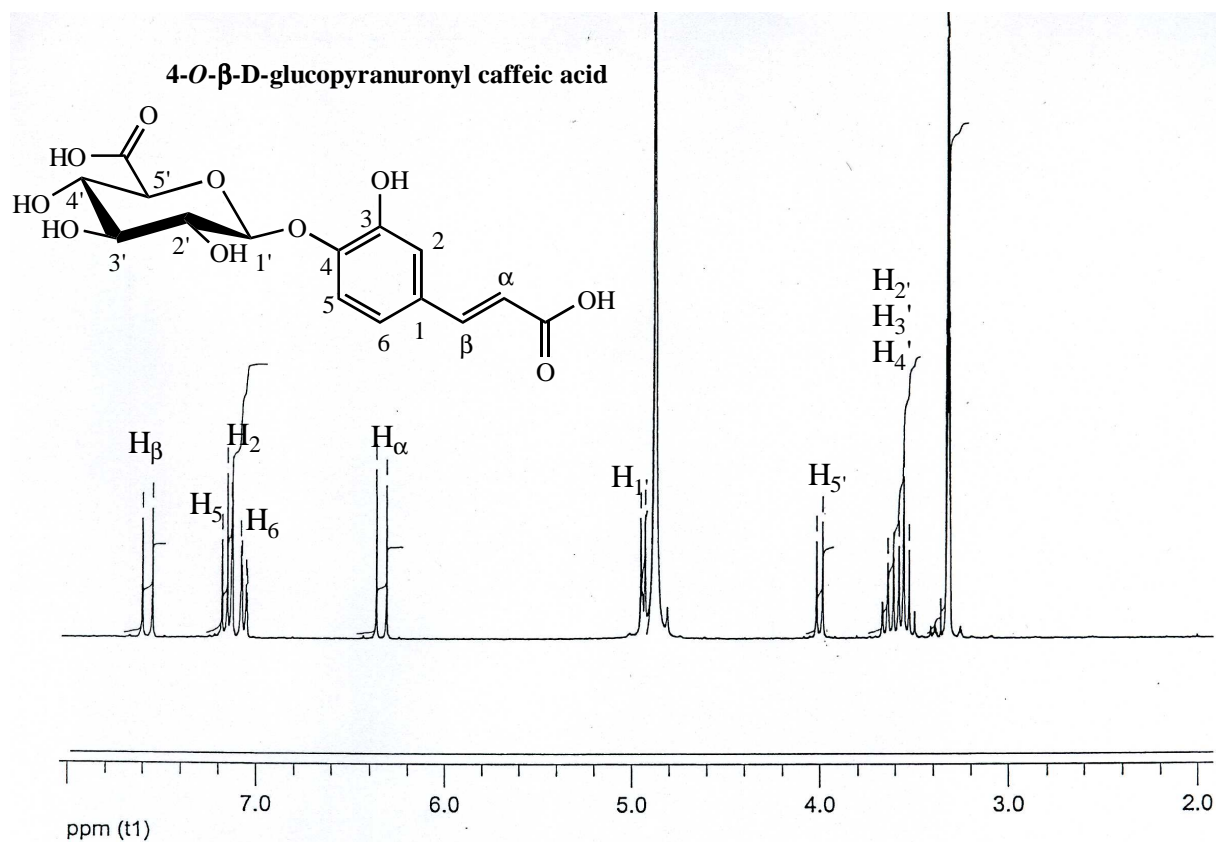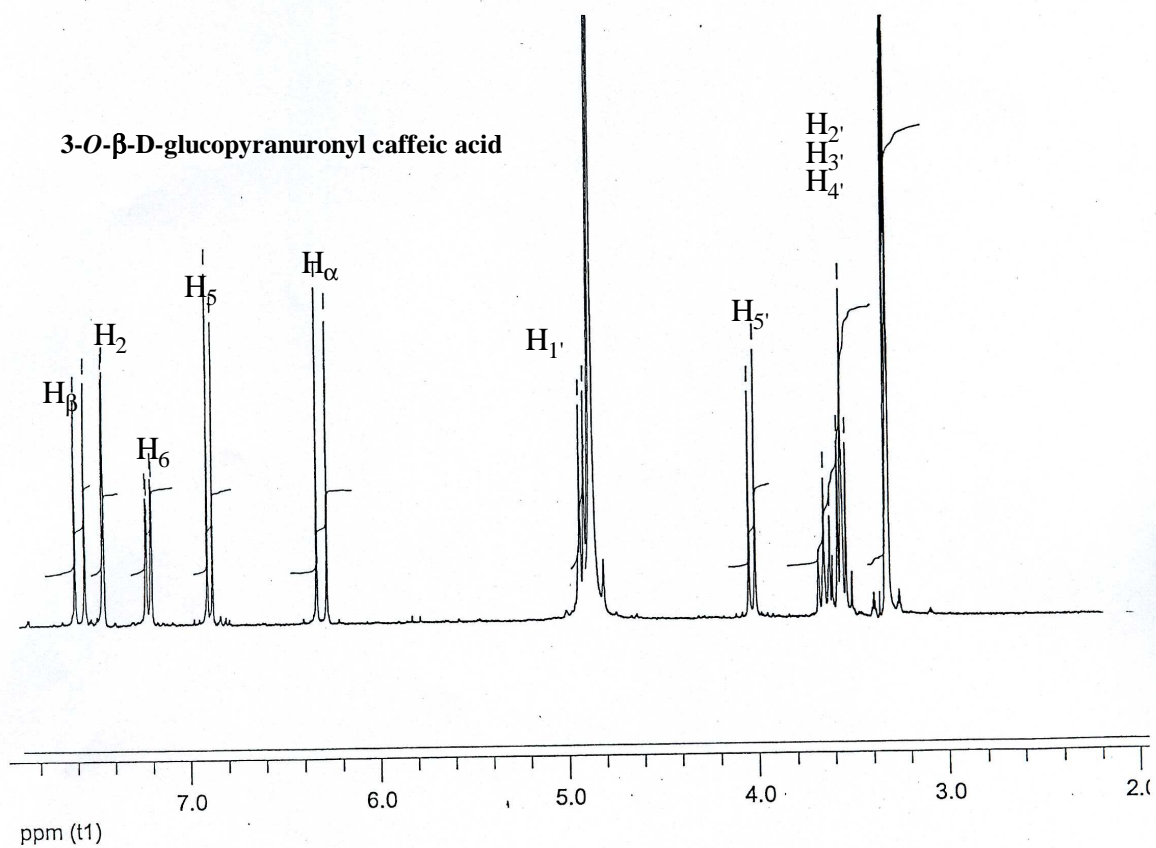

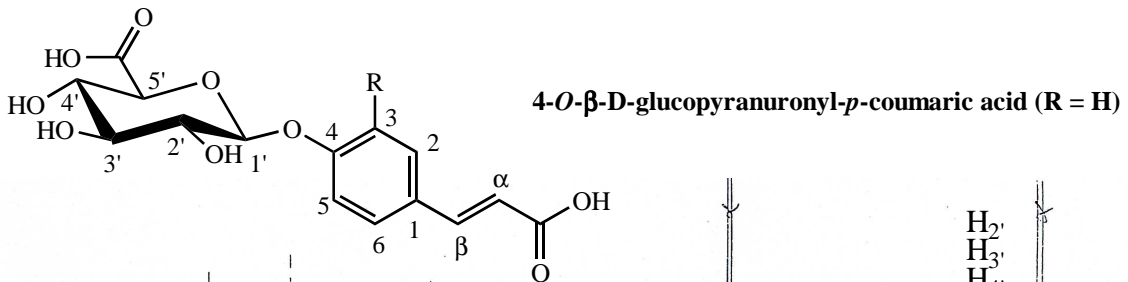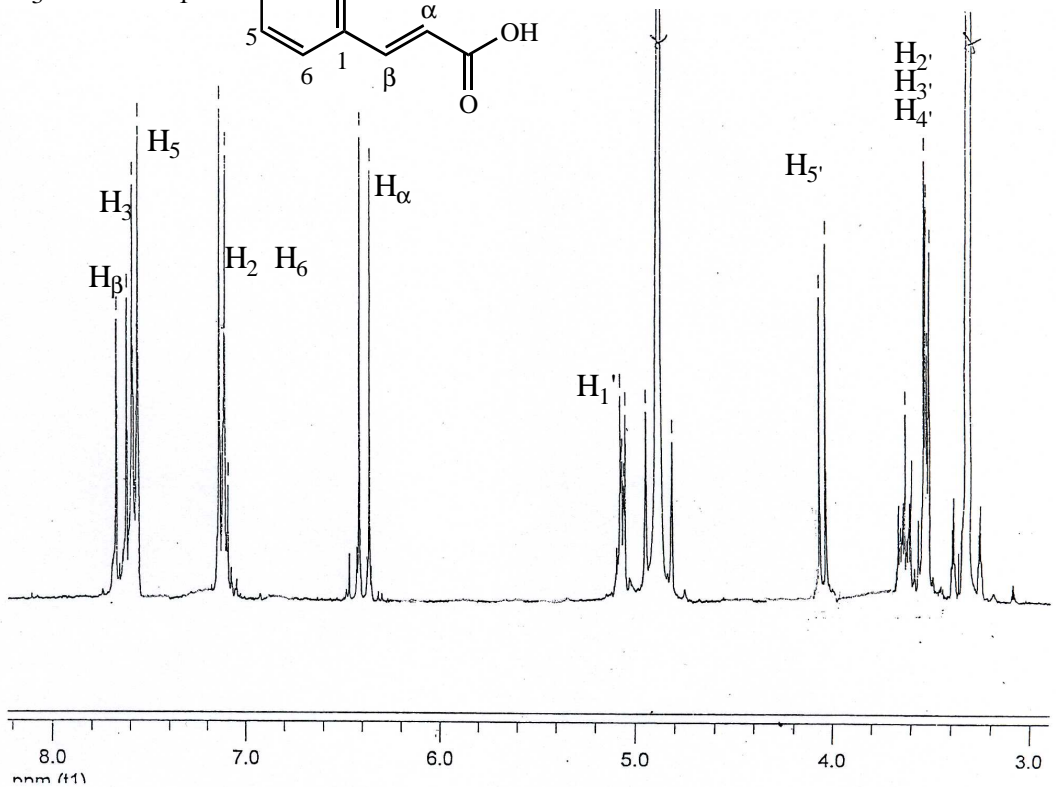

**4-O- $\beta$ -D-glucopyranuronyl ferulic acid (R = OMe)**

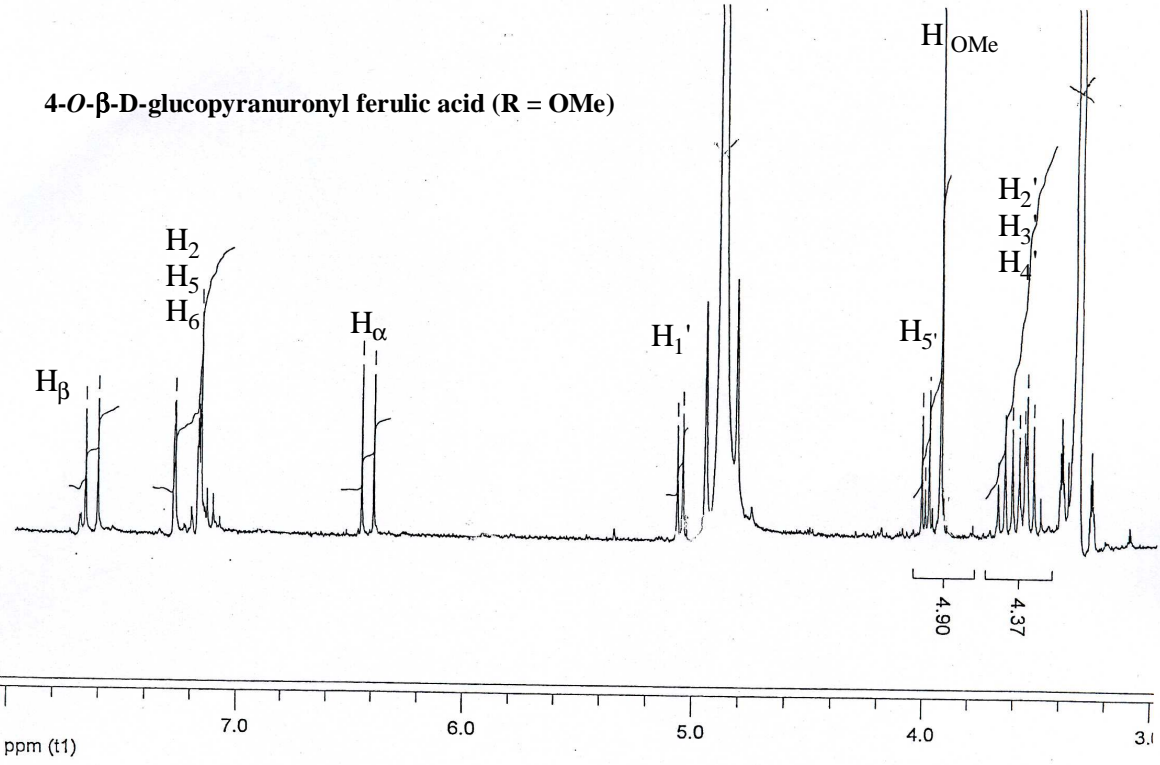

Supplement: b809965k.pdf [file b809965k.pdf]
